# Supplementary material for: Synthesis of a CO2-philic poly(vinyl acetate)-based cationic amphiphilic surfactant by RAFT/ATRP and its application in preparing monolithic materials
Source: Royal Society of Chemistry journal article supplement (doi:10.1039/c4gc00822g), 2014-01-01
Supplement: c4gc00822g1.pdf [file c4gc00822g1.pdf]

## Supporting information

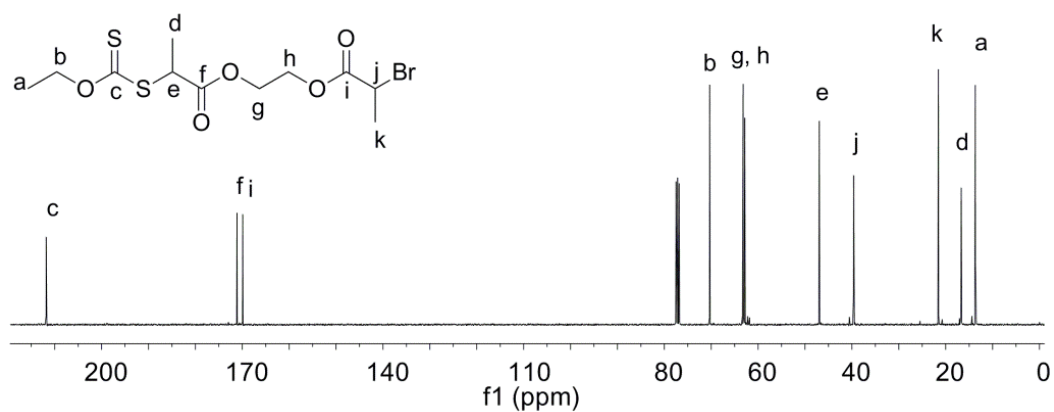

**Fig. S1** <sup>13</sup>C NMR analysis (CDCl<sub>3</sub>) of *S*-[1-Methyl-4-(6-Bromopropionate) Ethyl Acetate] *O*-Ethyl Dithiocarbonate.

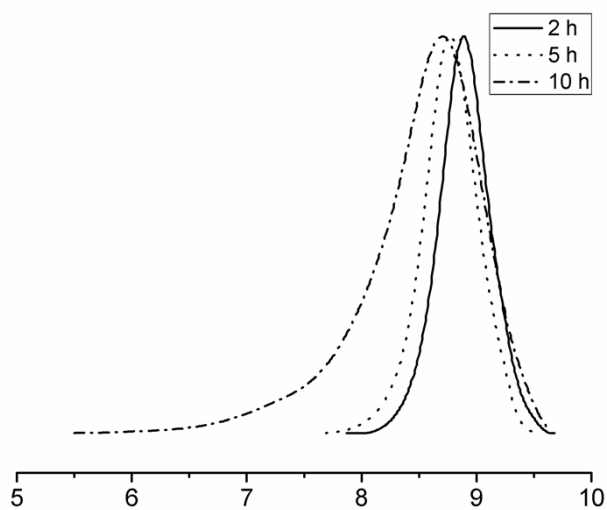

**Fig. S2** GPC analysis of PVAc-Br.
